# Supplementary material for: Rhabdomyolysis related to acute recreational drug toxicity—A Euro-DEN study
Source: PubMed Central journal article supplement (PMC7951866; doi:10.1371/journal.pone.0246297), 2021-03-11

# PLOS ONE

## Rhabdomyolysis related to acute recreational drug toxicity – a Euro-DEN study.

--Manuscript Draft--

|                              |                                                                                                                                                                                                                                                                                                                                                                                                                                                                                                                                                                                                                                                                                                                                                                                                                                                                                                                                                                                                                                                                                                                                                                                                                                                                                                                                                                                                                                                                                                                                                                                                                                                                                                                                                                                                                                                                                                                                                                                                                                                                                                                                                                                                                                                                                                                                                                                                                                                                                                                                                                                                                                                                                                                                                                                                                                                                                                                        |
|------------------------------|------------------------------------------------------------------------------------------------------------------------------------------------------------------------------------------------------------------------------------------------------------------------------------------------------------------------------------------------------------------------------------------------------------------------------------------------------------------------------------------------------------------------------------------------------------------------------------------------------------------------------------------------------------------------------------------------------------------------------------------------------------------------------------------------------------------------------------------------------------------------------------------------------------------------------------------------------------------------------------------------------------------------------------------------------------------------------------------------------------------------------------------------------------------------------------------------------------------------------------------------------------------------------------------------------------------------------------------------------------------------------------------------------------------------------------------------------------------------------------------------------------------------------------------------------------------------------------------------------------------------------------------------------------------------------------------------------------------------------------------------------------------------------------------------------------------------------------------------------------------------------------------------------------------------------------------------------------------------------------------------------------------------------------------------------------------------------------------------------------------------------------------------------------------------------------------------------------------------------------------------------------------------------------------------------------------------------------------------------------------------------------------------------------------------------------------------------------------------------------------------------------------------------------------------------------------------------------------------------------------------------------------------------------------------------------------------------------------------------------------------------------------------------------------------------------------------------------------------------------------------------------------------------------------------|
| <b>Manuscript Number:</b>    | PONE-D-20-18319                                                                                                                                                                                                                                                                                                                                                                                                                                                                                                                                                                                                                                                                                                                                                                                                                                                                                                                                                                                                                                                                                                                                                                                                                                                                                                                                                                                                                                                                                                                                                                                                                                                                                                                                                                                                                                                                                                                                                                                                                                                                                                                                                                                                                                                                                                                                                                                                                                                                                                                                                                                                                                                                                                                                                                                                                                                                                                        |
| <b>Article Type:</b>         | Research Article                                                                                                                                                                                                                                                                                                                                                                                                                                                                                                                                                                                                                                                                                                                                                                                                                                                                                                                                                                                                                                                                                                                                                                                                                                                                                                                                                                                                                                                                                                                                                                                                                                                                                                                                                                                                                                                                                                                                                                                                                                                                                                                                                                                                                                                                                                                                                                                                                                                                                                                                                                                                                                                                                                                                                                                                                                                                                                       |
| <b>Full Title:</b>           | Rhabdomyolysis related to acute recreational drug toxicity – a Euro-DEN study.                                                                                                                                                                                                                                                                                                                                                                                                                                                                                                                                                                                                                                                                                                                                                                                                                                                                                                                                                                                                                                                                                                                                                                                                                                                                                                                                                                                                                                                                                                                                                                                                                                                                                                                                                                                                                                                                                                                                                                                                                                                                                                                                                                                                                                                                                                                                                                                                                                                                                                                                                                                                                                                                                                                                                                                                                                         |
| <b>Short Title:</b>          | Rhabdomyolysis following acute recreational drug toxicity                                                                                                                                                                                                                                                                                                                                                                                                                                                                                                                                                                                                                                                                                                                                                                                                                                                                                                                                                                                                                                                                                                                                                                                                                                                                                                                                                                                                                                                                                                                                                                                                                                                                                                                                                                                                                                                                                                                                                                                                                                                                                                                                                                                                                                                                                                                                                                                                                                                                                                                                                                                                                                                                                                                                                                                                                                                              |
| <b>Corresponding Author:</b> | Piotr Maciej Kabata, M.D. Ph.D.<br>Pomorskie Centrum Toksykologii<br>Gdańsk, POLAND                                                                                                                                                                                                                                                                                                                                                                                                                                                                                                                                                                                                                                                                                                                                                                                                                                                                                                                                                                                                                                                                                                                                                                                                                                                                                                                                                                                                                                                                                                                                                                                                                                                                                                                                                                                                                                                                                                                                                                                                                                                                                                                                                                                                                                                                                                                                                                                                                                                                                                                                                                                                                                                                                                                                                                                                                                    |
| <b>Keywords:</b>             | Rhabdomyolysis; Recreational drugs; Acute Harm; Clinical toxicology; outcome.                                                                                                                                                                                                                                                                                                                                                                                                                                                                                                                                                                                                                                                                                                                                                                                                                                                                                                                                                                                                                                                                                                                                                                                                                                                                                                                                                                                                                                                                                                                                                                                                                                                                                                                                                                                                                                                                                                                                                                                                                                                                                                                                                                                                                                                                                                                                                                                                                                                                                                                                                                                                                                                                                                                                                                                                                                          |
| <b>Abstract:</b>             | <p><b>Background :</b> This study was conducted to retrospectively assess the relationships between: rhabdomyolysis (quantified by creatine kinase (CK) activity) and kidney injury (quantified by serum creatinine concentration), sex, age, body temperature on admission, presence of seizures, and agitation or aggression in patients presenting to the Emergency Department with acute recreational drug toxicity. We also investigated the association with the substances ingested.</p> <p><b>Methods:</b> All presentations to the 16 sentinel Euro-DEN centres in 10 European countries with acute recreational drug toxicity during the first year of the Euro-DEN study (October 2013 to September 2014) were considered. Cases that had abnormal CK activity recorded as part of routine clinical care were divided into 3 cohorts depending on peak CK activity. Cases with normal CK activity were included as a control group (4<sup>th</sup> cohort).</p> <p><b>Results:</b> Only 1,015 (18.4%) of the 5,529 Euro-DEN presentations had CK activity concentration recorded. Of this group 353 (34.8%) had also creatinine concentration measured. There were 375 (36.9%) with minor rhabdomyolysis, 69 (6.8%) with moderate rhabdomyolysis, and 24 (2.4%) with severe rhabdomyolysis; 547 (53.9%) were included in the control group. There was a positive correlation between CK activity and creatinine concentration (correlation coefficient <math>r=0.71</math>, <math>p&lt;0.0001</math>). There was no correlation between CK activity and body temperature at the time of presentation to the ED (correlation coefficient <math>r=0.07</math>, <math>p = 0.03</math>). There was a positive correlation between CK activity and length of stay in the hospital (<math>r=0.31</math>, <math>p&lt;0.001</math>). There was no association between CK activity and the presence of seizures (<math>p=0.33</math>) or agitation/aggression (<math>p=0.45</math>), patients age (<math>p=0.4</math>) or sex (<math>p=0.25</math>). The 5 most common agents amongst patients presenting with rhabdomyolysis were: cocaine (<math>n=107</math>; 22.9% presentations), amphetamine (76; 16.2%), cannabis (74; 15.8%), GHB/GBL (72; 15.4%) and heroin (67; 14.3%). In the group without rhabdomyolysis the most common agents were: cocaine (<math>n=122</math> presentations; 22.3%), cannabis (117; 21.4%), GHB/GBL (81; 14.8%), heroin (70; 12.1%) and amphetamine (66; 11.7%).</p> <p><b>Conclusions :</b> Abnormal values of CK activity occurred in almost half (46.1%) of presentations to the Emergency Department with acute recreational drug toxicity in whom CK activity was measured; however, severe rhabdomyolysis is seen in only a small minority (2.4%). Those with rhabdomyolysis are at significantly higher risk of kidney injury and have a longer length of hospital stay.</p> |
| <b>Order of Authors:</b>     | <p>Wojciech Waldman</p> <p>Piotr Maciej Kabata, M.D. Ph.D.</p> <p>Alison M Dines</p> <p>David M Wood</p> <p>Christopher Yates</p> <p>Fridtjof Heyerdahl</p> <p>Knut Erik Hovda</p>                                                                                                                                                                                                                                                                                                                                                                                                                                                                                                                                                                                                                                                                                                                                                                                                                                                                                                                                                                                                                                                                                                                                                                                                                                                                                                                                                                                                                                                                                                                                                                                                                                                                                                                                                                                                                                                                                                                                                                                                                                                                                                                                                                                                                                                                                                                                                                                                                                                                                                                                                                                                                                                                                                                                     |

|                                                                                                                                                                                                                                                                                                                                                                                                                                                                                                                                                                                                                                                                                                                                                                                                                                                                                                                                                                                                                                                                                                                                                                                                                                                                                                                                                                                     |                                                                                                                                                                                                                                                                                                                                                                         |
|-------------------------------------------------------------------------------------------------------------------------------------------------------------------------------------------------------------------------------------------------------------------------------------------------------------------------------------------------------------------------------------------------------------------------------------------------------------------------------------------------------------------------------------------------------------------------------------------------------------------------------------------------------------------------------------------------------------------------------------------------------------------------------------------------------------------------------------------------------------------------------------------------------------------------------------------------------------------------------------------------------------------------------------------------------------------------------------------------------------------------------------------------------------------------------------------------------------------------------------------------------------------------------------------------------------------------------------------------------------------------------------|-------------------------------------------------------------------------------------------------------------------------------------------------------------------------------------------------------------------------------------------------------------------------------------------------------------------------------------------------------------------------|
|                                                                                                                                                                                                                                                                                                                                                                                                                                                                                                                                                                                                                                                                                                                                                                                                                                                                                                                                                                                                                                                                                                                                                                                                                                                                                                                                                                                     | Isabelle Giraudon                                                                                                                                                                                                                                                                                                                                                       |
|                                                                                                                                                                                                                                                                                                                                                                                                                                                                                                                                                                                                                                                                                                                                                                                                                                                                                                                                                                                                                                                                                                                                                                                                                                                                                                                                                                                     | Paul I Dargan                                                                                                                                                                                                                                                                                                                                                           |
|                                                                                                                                                                                                                                                                                                                                                                                                                                                                                                                                                                                                                                                                                                                                                                                                                                                                                                                                                                                                                                                                                                                                                                                                                                                                                                                                                                                     | Jacek Sein Anand                                                                                                                                                                                                                                                                                                                                                        |
| <b>Additional Information:</b>                                                                                                                                                                                                                                                                                                                                                                                                                                                                                                                                                                                                                                                                                                                                                                                                                                                                                                                                                                                                                                                                                                                                                                                                                                                                                                                                                      |                                                                                                                                                                                                                                                                                                                                                                         |
| <b>Question</b>                                                                                                                                                                                                                                                                                                                                                                                                                                                                                                                                                                                                                                                                                                                                                                                                                                                                                                                                                                                                                                                                                                                                                                                                                                                                                                                                                                     | <b>Response</b>                                                                                                                                                                                                                                                                                                                                                         |
| <p><b>Financial Disclosure</b></p> <p>Enter a financial disclosure statement that describes the sources of funding for the work included in this submission. Review the <a href="#">submission guidelines</a> for detailed requirements. View published research articles from <a href="#">PLOS ONE</a> for specific examples.</p> <p>This statement is required for submission and <b>will appear in the published article</b> if the submission is accepted. Please make sure it is accurate.</p> <p><b>Unfunded studies</b><br/>Enter: <i>The author(s) received no specific funding for this work.</i></p> <p><b>Funded studies</b><br/>Enter a statement with the following details:</p> <ul style="list-style-type: none"> <li>• Initials of the authors who received each award</li> <li>• Grant numbers awarded to each author</li> <li>• The full name of each funder</li> <li>• URL of each funder website</li> <li>• Did the sponsors or funders play any role in the study design, data collection and analysis, decision to publish, or preparation of the manuscript?</li> <li>• <b>NO</b> - Include this sentence at the end of your statement: <i>The funders had no role in study design, data collection and analysis, decision to publish, or preparation of the manuscript.</i></li> <li>• <b>YES</b> - Specify the role(s) played.</li> </ul> <p>* typeset</p> | <p>With financial support from the DPIP/ISEC Programme of the European Union and the European Monitoring Centre for Drugs and Drug Addiction.</p> <p>All the authors had funding from the European Commission through the Euro-DEN project except ML and EL, whose costs were co-funded by the Swiss Centre for Applied Human Toxicology (SCAHT) and KP, IG and RS.</p> |
| <p><b>Competing Interests</b></p> <p>Use the instructions below to enter a competing interest statement for this submission. On behalf of all authors, disclose any <a href="#">competing interests</a> that could be perceived to bias this</p>                                                                                                                                                                                                                                                                                                                                                                                                                                                                                                                                                                                                                                                                                                                                                                                                                                                                                                                                                                                                                                                                                                                                    | <p>The authors have declared that no competing interests exist.</p>                                                                                                                                                                                                                                                                                                     |

work—acknowledging all financial support and any other relevant financial or non-financial competing interests.

This statement **will appear in the published article** if the submission is accepted. Please make sure it is accurate. View published research articles from [PLOS ONE](#) for specific examples.

**NO authors have competing interests**

Enter: *The authors have declared that no competing interests exist.*

**Authors with competing interests**

Enter competing interest details beginning with this statement:

*I have read the journal's policy and the authors of this manuscript have the following competing interests: [insert competing interests here]*

\* typeset

**Ethics Statement**

N/A

Enter an ethics statement for this submission. This statement is required if the study involved:

- Human participants
- Human specimens or tissue
- Vertebrate animals or cephalopods
- Vertebrate embryos or tissues
- Field research

Write "N/A" if the submission does not require an ethics statement.

General guidance is provided below. Consult the [submission guidelines](#) for detailed instructions. **Make sure that all information entered here is included in the Methods section of the manuscript.**

## Format for specific study types

### Human Subject Research (involving human participants and/or tissue)

- Give the name of the institutional review board or ethics committee that approved the study
- Include the approval number and/or a statement indicating approval of this research
- Indicate the form of consent obtained (written/oral) or the reason that consent was not obtained (e.g. the data were analyzed anonymously)

### Animal Research (involving vertebrate animals, embryos or tissues)

- Provide the name of the Institutional Animal Care and Use Committee (IACUC) or other relevant ethics board that reviewed the study protocol, and indicate whether they approved this research or granted a formal waiver of ethical approval
- Include an approval number if one was obtained
- If the study involved *non-human primates*, add *additional details* about animal welfare and steps taken to ameliorate suffering
- If anesthesia, euthanasia, or any kind of animal sacrifice is part of the study, include briefly which substances and/or methods were applied

### Field Research

Include the following details if this study involves the collection of plant, animal, or other materials from a natural setting:

- Field permit number
- Name of the institution or relevant body that granted permission

### Data Availability

Authors are required to make all data underlying the findings described fully available, without restriction, and from the time of publication. PLOS allows rare exceptions to address legal and ethical concerns. See the [PLOS Data Policy](#) and [FAQ](#) for detailed information.

No - some restrictions will apply

A Data Availability Statement describing where the data can be found is required at submission. Your answers to this question constitute the Data Availability Statement and **will be published in the article**, if accepted.

**Important:** Stating 'data available on request from the author' is not sufficient. If your data are only available upon request, select 'No' for the first question and explain your exceptional situation in the text box.

Do the authors confirm that all data underlying the findings described in their manuscript are fully available without restriction?

**Describe where the data may be found in full sentences. If you are copying our sample text, replace any instances of XXX with the appropriate details.**

- If the data are **held or will be held in a public repository**, include URLs, accession numbers or DOIs. If this information will only be available after acceptance, indicate this by ticking the box below. For example: *All XXX files are available from the XXX database (accession number(s) XXX, XXX).*
- If the data are all contained **within the manuscript and/or Supporting Information files**, enter the following: *All relevant data are within the manuscript and its Supporting Information files.*
- If neither of these applies but you are able to provide **details of access elsewhere**, with or without limitations, please do so. For example:

*Data cannot be shared publicly because of [XXX]. Data are available from the XXX Institutional Data Access / Ethics Committee (contact via XXX) for researchers who meet the criteria for access to confidential data.*

*The data underlying the results presented in the study are available from (include the name of the third party*

The data may be obtained from the authors, after acceptance of EuroDEN research group Steering Committee. The data have been obtained from a number of individual centres, and collated by the Steering Committee.

*and contact information or URL).*

- This text is appropriate if the data are owned by a third party and authors do not have permission to share the data.

\* typeset

Additional data availability information:

1 **Rhabdomyolysis related to acute recreational drug toxicity – a Euro-DEN study.**

2

3 Wojciech Waldman (1,2), Piotr M Kabata (2), Alison M Dines (3), David M Wood (3,4),  
4 Christopher Yates (5), Fridtjof Heyerdahl (6), Knut Erik Hovda (6), Isabelle Giraudon (7), Euro-  
5 DEN Research Group (8), Paul I Dargan (3,4), Jacek Sein Anand (1,2).

6

7 (1) Department of Clinical Toxicology, Medical University of Gdansk, Gdansk, Poland

8 (2) Pomeranian Centre of Toxicology, Gdansk, Poland (3) Clinical Toxicology, Guy's and St  
9 Thomas' NHS Foundation Trust and King's Health Partners, London, UK

10 (4) Faculty of Life Sciences and Medicine, King's College London, London, UK

11 (5) Hospital Universitari Son Espases, Palma de Mallorca, Spain

12 (6) Medical Division, Oslo University Hospital, Oslo, Norway

13 (7) European

14 Monitoring Centre for Drugs and Drug Addiction (EMCDDA), Lisbon, Portugal

15 (8) Euro-DEN Research Group.

16

17 **Acknowledgments:**

18 Euro-DEN Research Group Members:

19 Lucie Chevillard, Florian Eyer, Miguel Galicia, Catalina Homar, Gesche Jürgens, Evangelia

20 Liakoni, ME Liehti, Bruno Mégarbane, Oscar Miro, Adrian Moughty, Niall O'Connor, Raido

21 Paasma, Kristiina Pöld, Odd Martin Vallersnes, WS Waring

22

23

24 **Keywords:** Rhabdomyolysis; Recreational drugs; Acute Harm; Clinical toxicology; Outcome.

25

26 **Abbreviations:** AKI: acute kidney injury; ALT: alanine aminotransferase; AST: aspartate

27 aminotransferase; CK: creatine kinase; ED: emergency department; Euro-DEN: European Drug

28 Emergencies Network; GBL:  $\gamma$ -butyrolactone; GHB:  $\gamma$ -hydroxybutyric acid; IQR: interquartile

29 range; KDIGO: Kidney Disease: Improving Global Outcomes; LOS: Length of stay in hospital;

30 PSS: Poisoning Severity Score.

31

32

33 **Abstract:**

34

35 *Background:* This study was conducted to retrospectively assess the relationships between:  
36 rhabdomyolysis (quantified by creatine kinase (CK) activity) and kidney injury (quantified by  
37 serum creatinine concentration), sex, age, body temperature on admission, presence of seizures, and  
38 agitation or aggression in patients presenting to the Emergency Department with acute recreational  
39 drug toxicity. We also investigated the association with the substances ingested.

40

41 *Methods:* All presentations to the 16 sentinel Euro-DEN centres in 10 European countries with  
42 acute recreational drug toxicity during the first year of the Euro-DEN study (October 2013 to  
43 September 2014) were considered. Cases that had abnormal CK activity recorded as part of routine  
44 clinical care were divided into 3 cohorts depending on peak CK activity. Cases with normal CK  
45 activity were included as a control group (4<sup>th</sup> cohort).

46

47 *Results:* Only 1,015 (18.4%) of the 5,529 Euro-DEN presentations had CK activity concentration  
48 recorded. Of this group 353 (34.8%) had also creatinine concentration measured. There were 375  
49 (36.9%) with minor rhabdomyolysis, 69 (6.8%) with moderate rhabdomyolysis, and 24 (2.4%) with  
50 severe rhabdomyolysis; 547 (53.9%) were included in the control group. There was a positive  
51 correlation between CK activity and creatinine concentration (correlation coefficient  $r=0.71$ ,  
52  $p<0.0001$ ). There was no correlation between CK activity and body temperature at the time of  
53 presentation to the ED (correlation coefficient  $r=0.07$ ,  $p=0.03$ ). There was a positive correlation  
54 between CK activity and length of stay in the hospital ( $r=0.31$ ,  $p<0.001$ ). There was no association  
55 between CK activity and the presence of seizures ( $p=0.33$ ) or agitation/aggression ( $p=0.45$ ), patients  
56 age ( $p=0.4$ ) or sex ( $p=0.25$ ). The 5 most common agents amongst patients presenting with  
57 rhabdomyolysis were: cocaine ( $n=107$ ; 22.9% presentations), amphetamine (76; 16.2%), cannabis  
58 (74; 15.8%), GHB/GBL (72; 15.4%) and heroin (67; 14.3%). In the group without rhabdomyolysis  
59 the most common agents were: cocaine ( $n=122$  presentations; 22.3%), cannabis (117; 21.4%),  
60 GHB/GBL (81; 14.8%), heroin (70; 12.1%) and amphetamine (66; 11.7%).

61 *It would be more interesting to show distribution of rhabdomyolysis according to agents abused*

62 *Conclusions:* Abnormal values of CK activity occurred in almost half (46.1%) of presentations to  
63 the Emergency Department with acute recreational drug toxicity in whom CK activity was  
64 measured; however, severe rhabdomyolysis is seen in only a small minority (2.4%). Those with  
65 rhabdomyolysis are at significantly higher risk of kidney injury and have a longer length of hospital  
66 stay.

67



68 **Declarations**

69 **Ethics approval and consent to participate**

70 The study involved retrospective analysis of anonymised clinical data records. The need for  
71 approval was waived by the ethical committees of respective centres participating in the study.

72

73 **Availability of data and materials**

74 The data that support the findings of this study are available from Euro-DEN research group but  
75 restrictions apply to the availability of these data, which were used under license for the current  
76 study, and so are not publicly available. Data are however available from the authors upon  
77 reasonable request and with permission of Euro-DEN research group steering committee.

78

79 **Competing interests**

80 The authors declare that they have no competing interests.

81

82 **Funding:**

83 With financial support from the DPIP/ISEC Programme of the European Union and the European  
84 Monitoring Centre for Drugs and Drug Addiction.

85 All the authors had funding from the European Commission through the Euro-DEN project except  
86 ML and EL, whose costs were co-funded by the Swiss Centre for Applied Human Toxicology  
87 (SCAHT) and KP, IG and RS.

88

89

## 90 **Introduction**

91 Rhabdomyolysis is a syndrome that is characterized by the disintegration of striated muscle and the  
92 leakage of muscle-cell contents including myoglobin and creatine kinase (CK). The first detailed  
93 reports of rhabdomyolysis, related to the crush syndrome, and complicated with acute renal failure,  
94 were presented by Bywaters and Beall in the 1940s [1,2]. CK is more reliable than myoglobin in  
95 assessing the presence and intensity of damage to the muscles because overall CK degradation and  
96 removal are slow, the concentration of CK remains elevated much longer and in a more consistent  
97 manner than that of myoglobin. Definitions of rhabdomyolysis vary from that requiring CK  
98 elevation greater than approximately five times the upper limit of normal to more recent definitions  
99 requiring CK elevation greater than 50 times the upper limit of normal with renal insufficiency [3].  
100 Rhabdomyolysis is a serious condition, which may lead to life threatening complications.

101

102 The causes of rhabdomyolysis can be divided into hereditary and acquired ones. The acquired  
103 causes are classified as traumatic and non-traumatic. Non-traumatic causes are the most common  
104 during peacetime and include psychoactive drugs, alcohol abuse, and many others. The medical  
105 literature is filled with case reports of rhabdomyolysis resulting from snake and spider bites [4–6] to  
106 drugs like cocaine, methamphetamine [7–11], 3,4-methylenedioxymethamphetamine (MDMA)  
107 [12,13] and plant toxins [14].

108

109 Despite the fact that at least 150 medications and toxins have been described which may lead to  
110 rhabdomyolysis, recreational drugs and alcohol are the most common causes [15]. Many factors are  
111 known to contribute to development of rhabdomyolysis including seizures, agitation or aggression,  
112 immobilisation, excessive muscle activity, hypo- or hyperthermia [3,15–20], and potentially also  
113 direct substance-associated toxic effects in susceptible persons [21]. There have been no large,  
114 multicentre studies on the incidence of rhabdomyolysis in acute recreational drug toxicity.

115

116 The European Drug Emergencies Network (Euro-DEN) project collects data on presentations to  
117 sentinel Emergency Departments (ED) in Europe in whom the primary reason for presentation is  
118 acute recreational drug toxicity [22,23]. During the first year from October 2013 to September 2014  
119 data was collected from 16 sentinel centres in 10 European countries. The aim of this study was to  
120 use data from the Euro-DEN project to determine the relationship between maximum CK activity  
121 and factors frequently associated with rhabdomyolysis (creatinine concentration as a marker of  
122 acute kidney injury (AKI), length of stay in hospital, patients' temperature at admission, presence of  
123 seizures, agitation or aggression, hyperthermia) as well as others that might influence it (substances  
124 used by the patient and their number in case of multisubstance abuse).

125

## 126 **Materials and methods:**

### 127 *Data collection:*

128 All acute recreational drug toxicity presentations to the 16 sentinel ED in 10 European countries  
129 participating in the first year (October 2013 to September 2014) of the Euro-DEN project were  
130 included retrospectively using standard Euro-DEN methodology [22]. Patients presenting with other  
131 main complaints (including abstinence syndromes) who were under influence of psychoactive  
132 substances were excluded. Presentations involving intoxication with ethanol without other

Any justification for restricting the retrospective study to Oct 2013 to Sept 2014? Are there more recent data?

133 coingested psychoactive substances was excluded from the study. In case of lack of information  
134 regarding used substance from patient history or laboratory results, collective label “unknown  
135 substance” was used.

136 After completing first year of data collection, gathered dataset was revised and some of the  
137 variables (including creatinine concentration and CK activity) were removed.

138 In the Euro-DEN dataset only highest recorded CK activity and serum creatinine concentrations  
139 measured during patients stay were recorded [22,23].

140

141 *Data analysis:*

142 The dataset was converted from the Euro-DEN Excel spreadsheet to a comma separated values file.  
143 Data wrangling, analysis and visualisations for this analysis were performed in R programming  
144 language for statistics [24] with use of modules: ggplot2 [25], dplyr [26], gridExtra [27], reshape2  
145 [28]. Analysis was performed by the Euro-DEN centre located in Gdansk Poland.

146

147 Only 1015 (18.4%) of the 5,529 Euro-DEN presentations over the study period had CK activity  
148 recorded in the database and included in the analysis. Parameters analysed were: time from use to  
149 presentation, self-reported number of agents used, what agents were used (reported), presence of  
150 seizures, body temperature on admission, presence of agitation/aggression, maximum CK activity  
151 recorded, maximum creatinine recorded, length of stay in hospital (LOS). All the missing values  
152 were filled with ‘NA’ value.

153

154 For further analysis presentations were divided into 4 cohorts depending on maximum CK activity.  
155 The values used for the partitioning of the data were based on values used in Poison Severity Score  
156 (PSS) [29]: 1. no rhabdomyolysis (CK below 250 IU/L), 2. minor rhabdomyolysis (CK 251 – 1,500  
157 IU/L), 3. moderate rhabdomyolysis (CK 1,501 – 10,000 IU/L), 4. severe rhabdomyolysis (CK  
158 above 10,000 IU/L). It should be noted, that the severity of rhabdomyolysis does not have to be  
159 consistent with severity of poisoning, which was not assessed in this analysis.

160 Fragmented groups of substances sharing chemical and toxicological properties (for example  
161 benzodiazepines) were treated as one causative agent during the analysis.

162 *The use of range and interquartile range as measure of data spread suggest that the data were not normally  
163 distributed. Hence the use of parametric test such as pearson's moment correlation and ANOVA for analysis may  
164 not be appropriated.*

163 *Statistical analysis:*

164 Threshold for statistical significance for the testing was established at  $p < 0.01$  (probability of type I  
165 error smaller than 1%). We used both range and interquartile range (IQR) as measures of data  
166 spread. Correlations were tested using Pearson's product-moment correlation coefficient. For  
167 assessing relationship between multiple factors, we used analysis of variance (ANOVA). Where  
168 analysis of means between the groups was needed, Welch Two Sample t-test was performed.

169

## 170 **Results:**

171 Only presentations with CK activity recorded (N = 1015) were included in the analysis. The median  
172 (IQR; range) CK was 228 (124.5 – 448.0; 30 – 169,700) IU/L.

| CK (IU/L)  | ≤ 250 IU/l  | 250 - 1500 IU/l | 1501 – 10000 IU/l | CK >10000 IU/l | Total       |
|------------|-------------|-----------------|-------------------|----------------|-------------|
| <b>n</b>   | 547 (53.9%) | 375 (36.9%)     | 69 (6.8%)         | 24 (2.4%)      | 1015 (100%) |
| <b>Min</b> | 30          | 252             | 1522              | 10036          | 30          |

|               |              |               |                 |                   |               |
|---------------|--------------|---------------|-----------------|-------------------|---------------|
| <b>Max</b>    | 250          | 1397          | 9441            | 169700            | 169700        |
| <b>Median</b> | 132.0        | 441.0         | 2595.0          | 21934.0           | 228.0         |
| <b>IQR</b>    | 94.0 – 183.0 | 319.0 – 684.5 | 1986.0 – 4030.0 | 16760.0 – 63640.0 | 124.0 – 488.0 |

173 Table 1. Creatine Kinase (CK) results in the 1015 Euro-DEN Presentations

174 As shown in Table 1, 46.1% of this cohort had a CK > 250 IU/L, the majority of whom had minor  
175 rhabdomyolysis.

176

177 **CK vs. Creatinine:**

178 Of the 1015 patients included in our analysis only 353 (39,11%) had both CK and creatinine  
179 concentration recorded.

180 In the total studied population, median creatinine was 0.90 mg/dl (min 0.40 mg/dl, max 6.94 mg/dl,  
181 IQR 0.72 – 1.10 mg/dl). For patients with no rhabdomyolysis median creatinine was 0.80 mg/dl  
182 (min 0.41 mg/dl, max 1.47 mg/dl, IQR 0.69 – 0.91 mg/dl). For patients with rhabdomyolysis  
183 median creatinine was 0.99 mg/dl (min 0.40 mg/dl, max 6.94 mg/dl, IQR 0.81 – 1.20 mg/dl).

184 Median creatinine of patients with minor rhabdomyolysis was 0.91 mg/dl (min 0.40 mg/dl, max  
185 1.75 mg/dl, IQR 0.80 – 1.10 mg/dl). Median creatinine of patients with moderate rhabdomyolysis  
186 was 1.01 mg/dl (min 0.56 mg/dl, max 2.40 mg/dl, IQR 0.86 – 1.37 mg/dl). Median creatinine of  
187 patients with severe rhabdomyolysis was 1.65 mg/dl (min 0.54 mg/dl, max 6.94 mg/dl, IQR 0.95 –  
188 2.97 mg/dl). The correlation between CK activity and creatinine was 0.71,  $p < 0,0001$ . In the  
189 patients with both creatinine and CK measured 44 (12.5%) had creatinine concentration of 1.2  
190 mg/dl or higher, which was considered a marker of kidney injury.

191 The prevalence of kidney injury is presented in Table 2. The presence of rhabdomyolysis increased  
192 the odds of kidney injury 3.97 times.

193

What is your definition of Kidney injury ? This should be elaborated in the method

194

| Kidney injury   | [ALL]<br>N=353 | No<br>N=309 | Yes<br>N=44 | Odds Ratio       | p for odds ratio | p overall |
|-----------------|----------------|-------------|-------------|------------------|------------------|-----------|
| Cohort:         |                |             |             |                  |                  |           |
| NONE            | 188 (53.3%)    | 177 (57.3%) | 11 (25.0%)  | Reference        | Reference        | <0.001    |
| MINOR           | 124 (35.1%)    | 109 (35.3%) | 15 (34.1%)  | 2.20 [0.97;5.13] | 0.058            |           |
| MODERATE        | 31 (8.78%)     | 19 (6.15%)  | 12 (27.3%)  | 9.95 [3.84;26.4] | <0.001           |           |
| SEVERE          | 10 (2.83%)     | 4 (1.29%)   | 6 (13.6%)   | 22.9 [5.57;106]  | <0.001           |           |
| Rhabdomyolysis: |                |             |             |                  |                  | <0.001    |
| No              | 188 (53.3%)    | 177 (57.3%) | 11 (25.0%)  | Reference        | Reference        |           |

This Table should be properly labelled. Also, distinguish between the exposure and outcome variable.

|     |             |             |            |                  |        |  |
|-----|-------------|-------------|------------|------------------|--------|--|
| Yes | 165 (46.7%) | 132 (42.7%) | 33 (75.0%) | 3.97 [1.99;8.55] | <0.001 |  |
|-----|-------------|-------------|------------|------------------|--------|--|

195

196 The relationships between peak CK activity and peak creatinine concentration are shown in figure  
 197 1; as shown, there was a significant positive correlation between peak CK activity and creatinine  
 198 concentration.

199

200 Figure 1. Correlation between CK activity and max serum creatinine concentrations. r - Pearson correlation coefficient,  
 201 p - confidence level.

202

203 *CK vs age:* The interval is to wide to report mean. Median will be more appropriate

204 The youngest patient in the study was 12 years old, the oldest was 88 years old. Mean age of a  
 205 patient was 30,7 years.

206 There was no significant correlation between the age of a patient and CK activity (p=0.41). report r

207

208 *CK vs sex of a patient:*

209 The study included 241 women and 774 men. Rhabdomyolysis has been observed in 68 (28,2%)  
 210 women and 400 (51,7%) of male patients. The differences in CK activity were significant only for  
 211 patients with no rhabdomyolysis. was Include the test statistics

212

213 *CK vs length of stay in hospital:*

214 The length of stay in hospital (LOS) was longer in those with more severe rhabdomyolysis. In the  
 215 total studied population, median LOS was 12.75 h (min 0.58 h, max 664 h, IQR 5.00 – 37.58 h). For  
 216 patients with no rhabdomyolysis median LOS was 10.23 h (min 0.62 h, max 501 h, IQR 3.97 –  
 217 27.37 h). Median LOS of patients with minor rhabdomyolysis was 9.92 h (min 0.98 h, max 453.78  
 218 h, IQR 4.20 – 25.87 h). Median LOS of patients with moderate rhabdomyolysis was 25.25 h (min  
 219 0.58 h, max 664.00 h, IQR 12.63 – 55.91 h). Median LOS of patients with severe rhabdomyolysis  
 220 was 108.98 h (min 2.81 h, max 661.15 h, IQR 43.09 – 255.80 h). The correlation between CK  
 221 activity and LOS was 0.31, p<0,001.

222

223 *CK vs. body temperature on admission:*

224 Of 1015 patients included in our analysis body temperature on admission was measured in 933  
 225 (91.92%). The data indicates that there is no correlation between body temperature on admission  
 226 and rhabdomyolysis (r = 0.07, p = 0.03).

227

228 *CK vs. presence of seizures and agitation or aggression:*

229 There was a no significant relationship between seizures being present at any time during the  
 230 presentation and the severity of the rhabdomyolysis (Table 3).

|          | Total        |                | No rhabdomyolysis |                | Mild rhabdomyolysis |                | Moderate rhabdomyolysis |               | Severe rhabdomyolysis |            |
|----------|--------------|----------------|-------------------|----------------|---------------------|----------------|-------------------------|---------------|-----------------------|------------|
|          | Yes          | No             | Yes               | No             | Yes                 | No             | Yes                     | No            | Yes                   | No         |
| Seizures | 72<br>(7.1%) | 941<br>(92.7%) | 34<br>(6.2%)      | 512<br>(93.6%) | 28<br>(7.5%)        | 347<br>(92.5%) | 5 (7.3%)                | 64<br>(92.8%) | 5<br>(20.8%)          | 18 (75.0%) |

|                             |             |             |             |             |             |             |            |            |            |            |
|-----------------------------|-------------|-------------|-------------|-------------|-------------|-------------|------------|------------|------------|------------|
| Median CK                   | 266         | 225         | 135         | 131         | 483         | 440         | 2552       | 2624       | 22080      | 19450      |
| Agitation / Aggression      | Yes         | No          | Yes         | No          | Yes         | No          | Yes        | No         | Yes        | No         |
| n (% of patients in cohort) | 390 (38.4%) | 624 (61.5%) | 176 (32.2%) | 370 (67.6%) | 165 (44.0%) | 210 (56.0%) | 37 (53.6%) | 32 (46.4%) | 12 (50.0%) | 12 (50.0%) |
| Median                      | 286         | 208         | 144         | 125         | 469         | 430         | 2365       | 2834       | 21380      | 22440      |

231 Table 3. CK activity, seizures at any time during the admission and agitation/aggression on admission. For 2 patients (1  
232 in No rhabdomyolysis and 1 in Severe rhabdomyolysis cohort) there was no information regarding presence of seizures.  
233 For 1 patient (in No rhabdomyolysis cohort) there was no information regarding presence of agitation/aggression.

234 *CK vs. drugs used:*

235 As shown in Table 4 the drugs used by those with rhabdomyolysis were similar to those without  
236 rhabdomyolysis. *It is difficult to interpret this table. It should be presented in a clearer format.*

| Total population  |                  | Patients without rhabdomyolysis |                  | Patients with rhabdomyolysis |                  | Odds ratio | Odds ratio Confidence interval |
|-------------------|------------------|---------------------------------|------------------|------------------------------|------------------|------------|--------------------------------|
| Substance used    | Frequency (N, %) | Substance used                  | Frequency (N, %) | Substance used               | Frequency (N, %) |            |                                |
| Cocaine           | 229 (22.6%)      | Cocaine                         | 122 (22.3%)      | Cocaine                      | 107 (22.9%)      | 1.03       | 0.79-1.34                      |
| Cannabis          | 192 (18.9%)      | Cannabis                        | 117 (21.4%)      | Amphetamine                  | 76 (16.2%)       | 1.34       | 0.97-1.89                      |
| GHB/GBL           | 153 (15.1%)      | GHB/GBL                         | 81 (14.8%)       | Cannabis                     | 74 (15.8%)       | 0.74       | 0.54-0.99                      |
| Amphetamine       | 142 (14.0%)      | Heroin                          | 70 (12.1%)       | GHB/GBL                      | 72 (15.4%)       | 1.04       | 0.75-1.44                      |
| Heroin            | 137 (13.5%)      | Amphetamine                     | 66 (11.7%)       | Heroin                       | 67 (14.3%)       | 1.12       | 0.8-1.58                       |
| Unknown substance | 45 (4.3%)        | Unknown substance               | 21 (3.8%)        | Unknown substance            | 24 (5.1%)        |            |                                |

237 Table 4. 5 Most commonly reported psychoactive substances (as stated in medical records). For a reference number of  
238 unidentified agents was added.

239  
240 There was no significant correlation between those values of CK activity in studied cohorts, and the  
241 number of agents (self-reported or tested) taken by the patient.

242 We have calculated the odds ratios for most frequently used substances. The calculation show, that  
243 the highest potential for rhabdomyolysis development is seen in amphetamine (OR 1.41).

244

## 245 Discussion:

246 Our results have shown that in almost half of the patients presenting to the ED with acute  
247 recreational drug toxicity in whom clinicians decided to measure CK activity due to higher risk of  
248 rhabdomyolysis, had elevated CK activities. This result might be biased by the fact that probably  
249 some of the centres measured CK activity only in patients that either clinically showed signs of  
250 muscle injury or their history suggested possible development of the condition. The majority of  
251 these had minor or moderate rhabdomyolysis, and only 2.4% developed severe rhabdomyolysis.  
252 There was a positive association between creatinine concentrations and the severity of  
253 rhabdomyolysis. However, the median creatinine concentration was elevated only in patients with  
254 CK activities >10 000 U/L. Due to study design, only highest creatinine concentration was  
255 recorded, thus it was not possible to check the patients against Kidney Disease: Improving Global  
256 Outcomes (KDIGO) acute kidney injury criteria. Data were also not available on the need for renal  
257 replacement therapy.

258

259 The mechanism of rhabdomyolysis in acute recreational drug toxicity is variable - some drugs have  
260 direct myocytotoxic effects, whilst others can increase physical activity to deleterious levels,  
261 produce ischemia due to arterial vasoconstriction and precipitate seizures or hyperthermia [21,30-  
262 35]. Depressant intoxication can also lead to immobilisation and rhabdomyolysis related to  
263 compression and ischemic injury. For example, in a small previous study CK levels were correlated  
264 with the duration of coma and coma was more prolonged in patients with combined use of  $\gamma$ -  
265 hydroxybutyric acid (GHB) and stimulants [33,34].

266  
267 Although illicit drugs are well-described precipitants of rhabdomyolysis [36,37], there is limited  
268 data on the frequency of rhabdomyolysis in patients presenting with acute recreational drug toxicity.  
269 Due to different study methodology, inclusion criteria based upon emergency or hospital physician  
270 coding, and variable definitions of “renal failure”, these studies may be difficult to compare.  
271 Importantly none of studies included patients discharged from ED or performed follow-up of  
272 patients to identify adverse events post-hospital discharge. We have found only one study, presented  
273 by Grunau et al., that compared CK activities of patients who were admitted to the hospital to those  
274 measured in all ED presentations. In this study, 400 cases of rhabdomyolysis, defined as CK level  
275 greater than 1 000 U/l, were found by the authors in 9,509 patients who had CK activity test ordered  
276 out of 235,947 ED visits. 30-day follow-up was performed after ED treatment. 35% of patients were  
277 discharged home from ED. The most common ED discharge diagnoses were related to recreational  
278 drug use, infections, and traumatic or musculoskeletal complains. Within 30 days 21 (5.3%) patients  
279 died with 18 (4.5%) requiring hemodialysis. AKI occurred in 151 (38%) patients. In this work, the  
280 authors found that higher CK values were not associated with worse outcomes and concluded that  
281 initial creatinine was the best predictor of outcome [39]. Completely different results were obtained  
282 by Janković et al. who analysed the incidence of rhabdomyolysis in acute poisoning with different  
283 agents in Serbia. Rhabdomyolysis occurred at a relatively high rate in 125 out of 656 patients  
284 during a one-year period (19%). Rhabdomyolysis was mainly mild (61%) (CK from 250 to 1500  
285 U/l), or moderate (36%) (CK from 1500 to 10000), and only in 3% of the patients was  
286 rhabdomyolysis severe. The incidence of rhabdomyolysis was highest in poisonings involving  
287 opiates (41%), pesticides (38%), neuroleptics (26%), anticonvulsants (26%), ethanol (20%) and  
288 gases (19%). Psychotropic agents were the most common causes of poisonings, and consequently of  
289 rhabdomyolysis. One limitation of this study was that rhabdomyolysis was diagnosed based only on  
290 biochemical indicator (CK), without clinical signs and symptoms [41].

291  
292 As there are no universal CK activity criteria to establish diagnosis of rhabdomyolysis, we used the  
293 Poisoning Severity Score to determine severity of rhabdomyolysis. Partitioning to cohorts was  
294 important for the analysis, due to data spread (maximum CK activity was 5657 times higher than  
295 the minimum). Cohorts with normal CK activity vs. elevated were similar in size (N=547 vs.  
296 N=468). A group with elevated CK represented 8.5% of total and 46.2% of patients where CK was  
297 measured. Only 353 patients had both CK and creatinine measured.

298  
299 Literature data show that higher CK activities correlated with degree of muscle injury, but  
300 correlated only slightly with the development of AKI or mortality [15,36,40,42–46]. The incidence  
301 of AKI secondary to rhabdomyolysis varies from 10% to 59%, whilst it is estimated that 5% to 15%  
302 of AKI cases can be attributed to rhabdomyolysis [15,16,36,38,40,42-44]. In previous studies on

303 cocaine-intoxicated patients, the prevalence of AKI as the consequence of rhabdomyolysis was  
304 reported as 24% to 33% [9,11]. Based on our analysis we have observed a statistically significant  
305 positive correlation between highest CK activity and highest creatinine concentration in a general  
306 population as well as in most of the cohorts. The severity of rhabdomyolysis was associated with  
307 longer hospitalisation and thus could lead to higher treatment costs.

308  
309 Our study did not show any correlation between the number of substances involved and  
310 rhabdomyolysis. The most common agents used by patients who developed rhabdomyolysis, were  
311 the same as those in patients without rhabdomyolysis with the 5 most common being cocaine,  
312 cannabis, GHB/GBL ( $\gamma$ -butyrolactone) amphetamine and heroine. Cocaine is a known factor  
313 contributing to development of muscular injury [9,11,38]. A PubMed search for  
314 “cannabis+rhabdomyolysis” showed only 8 results, of which only one was a report of connection  
315 between cannabis use and incidence of rhabdomyolysis, however the direct cause of the injury was  
316 falling asleep while sitting cross-legged. In our data, only 12 patients having seizures have used  
317 cannabis. Of this group 9 had no rhabdomyolysis and 3 minor rhabdomyolysis, which supports that  
318 observation. There is only a limited data on relationship between GHB/GBL and rhabdomyolysis in  
319 the literature, and most were reported cases involving muscle injury during withdrawal syndrome  
320 [33, 34, 47]. Considering the clinical effect of GHB/GBL, it can be assumed that rhabdomyolysis is  
321 caused by patient’s immobility for prolonged periods. It should be noted, that MDMA was the most  
322 prevalent substance found in patients who developed severe rhabdomyolysis, however this group  
323 was relatively small, which might have influenced the result.

#### 324 325 **Limitations of the study:**

326 The study was designed as a retrospective analysis of a large volume of clinical history records.  
327 Laboratory test data (CK activity and creatinine) were only recorded if these were taken as part of  
328 routine clinical care; this could potentially lead to a selection bias in the studied data as the patients  
329 with clinical signs of rhabdomyolysis would be tested more frequently. No data regarding physical  
330 activity in days before presentation was gathered, opening possibility to including patients who  
331 developed exertional rhabdomyolysis in the group. Due to the study design only the highest  
332 recorded CK activity and creatinine concentration was included, and data were not collected on  
333 previous renal function to be able to confirm that any kidney injury present was AKI rather than  
334 underlying chronic kidney disease. As the data were obtained from hospitals information systems, it  
335 was not possible to assure consistency of CK activity and creatinine concentration analytical  
336 methods. Information on agents used was based largely on patient self-report with laboratory  
337 confirmation in a minority; it should be noted however, that work by Liakoni et al. has shown that  
338 patient self-report is reliable particularly for traditional illicit drugs [48]. The data entered into the  
339 data collection tool were taken from medical histories and it was difficult to differentiate reported  
340 drug use from analytically confirmed in post-hoc analysis.

341 Due to revision of gathered dataset variables, we do not have information on CK activities and  
342 creatinine concentrations from EuroDEN presentations after first 12 months of the study.

#### 343 344 **Conclusions:**

345 Abnormal values of CK activity may occur in up to half of presentations to the Emergency  
346 Department following acute recreational drug toxicity whose clinical signs suggest muscle injury



347 but severe rhabdomyolysis is much less common. Patients with rhabdomyolysis are at significantly  
348 higher risk of kidney injury (3.97 times higher, and 22.9 times higher for severe rhabdomyolysis) and  
349 spend more time in the hospital with a length of stay that is directly proportional to CK activity.  
350 Therefore, we suggest that it is valuable for patient management to check serum CK activity and  
351 creatinine concentrations in patients presenting to the Emergency Department with severe acute  
352 recreational drug toxicity as a part of routine laboratory testing.

353  
354  
355

356 **Literature:**

357

- 358 1. Bywaters EG, Beall D. Crush Injuries with Impairment of Renal Function. *Br Med J. BMJ*  
359 Publishing Group; 1941;1: 427–32. Available:  
360 <http://www.ncbi.nlm.nih.gov/pubmed/20783577>
- 361 2. Bywaters EGL. Experimental crushing injury. *Surg Gynecol Obs.* 1942;75: 612–627.
- 362 3. Thompson PD, Clarkson P, Karas RH. Statin-associated myopathy. *Jamae. American*  
363 *Medical Association*; 2003;289: 1681–1690.
- 364
- 365 4. Bush SP, Jansen PW. Severe rattlesnake envenomation with anaphylaxis and  
366 rhabdomyolysis. *Ann Emerg Med. Elsevier*; 1995;25: 845–848.
- 367 5. Bush SP, Siedenburg E. Neurotoxicity associated with suspected southern Pacific rattlesnake  
368 (*Crotalus viridis helleri*) envenomation. *Wilderness Environ Med. Elsevier*; 1999;10: 247–  
369 249.
- 370 6. Cohen J, Bush S. Case report: compartment syndrome after a suspected black widow spider  
371 bite. *Ann Emerg Med. Elsevier*; 2005;45: 414–416.
- 372 7. Brody SL, Wrenn KD, Wilber MM, Slovis CM. Predicting the severity of cocaine-associated  
373 rhabdomyolysis. *Ann Emerg Med. Elsevier*; 1990;19: 1137–1143.
- 374 8. Richards JR, Johnson EB, Stark RW, Derlet RW. Methamphetamine abuse and  
375 rhabdomyolysis in the ED: a 5-year study. *Am J Emerg Med. Elsevier*; 1999;17: 681–685.
- 376 9. Roth D, Alarcón FJ, Fernandez JA, Preston RA, Bourgoignie JJ. Acute rhabdomyolysis  
377 associated with cocaine intoxication. *N Engl J Med.* 1988;319: 673–7.  
378 doi:10.1056/NEJM198809153191103
- 379 10. Singhal PC, Rubin RB, Peters A, Santiago A, Neugarten J. Rhabdomyolysis and acute renal  
380 failure associated with cocaine abuse. *J Toxicol Clin Toxicol. Taylor & Francis*; 1990;28:  
381 321–330.
- 382 11. Welch RD, Todd K, Krause GS. Incidence of cocaine-associated rhabdomyolysis. *Ann*  
383 *Emerg Med.* 1991;20: 154–7. Available: <http://www.ncbi.nlm.nih.gov/pubmed/1996798>
- 384 12. Cunningham M. Ecstasy-induced rhabdomyolysis and its role in the development of acute  
385 renal failure. *Intensive Crit care Nurs. Elsevier*; 1997;13: 216–223.
- 386 13. Traub SJ, Hoffman RS, Nelson LS. The “ecstasy” hangover: hyponatremia due to 3, 4-  
387 methylenedioxymethamphetamine. *J Urban Heal. Springer*; 2002;79: 549–555.
- 388 14. Sein Anand J, Kabata P, Barwina M, Waldman W. Some Aspects of Intoxication with  
389 *Tricholoma equestre*. *Clin Toxicol.* 2011;49: 230.

- 390 15. Melli G, Chaudhry V, Cornblath DR. Rhabdomyolysis: an evaluation of 475 hospitalized  
391 patients. *Medicine (Baltimore)*. 2005;84: 377–85.
- 392 16. Larbi EB. Drug-induced rhabdomyolysis. *Ann Saudi Med*. 18: 525–30. Available:  
393 <http://www.ncbi.nlm.nih.gov/pubmed/17344731>
- 394 17. Allison RC, Bedsole DL. The other medical causes of rhabdomyolysis. *Am J Med Sci*.  
395 Elsevier; 2003;326: 79–88.
- 396 18. Warren J, Blumbergs P, Thompson P. Rhabdomyolysis: a review. *Muscle Nerve*. 2002;25:  
397 334–47.
- 398 19. Prendergast BD, George CF. Drug-induced rhabdomyolysis - mechanisms and management.  
399 *Postgrad Med J*. 1993;69: 333–336.
- 400 20. Zager RA. Rhabdomyolysis and myohemoglobinuric acute renal failure. *Kidney Int*.  
401 Elsevier; 1996;49: 314–326.
- 402 21. Zhou, X., Luethi, D., Sanvee, G. M., Bouitbir, J., Liechti, M. E., & Krähenbühl, S. (2019).  
403 Molecular Toxicological Mechanisms of Synthetic Cathinones on C2C12 Myoblasts.  
404 *International Journal of Molecular Sciences*, 20(7), 1561.
- 405 22. Dines AM, Wood DM, Yates C, Heyerdahl F, Hovda KE, Giraudon I, et al. Acute  
406 recreational drug and new psychoactive substance toxicity in Europe: 12 months data  
407 collection from the European Drug Emergencies Network (Euro-DEN). *Clin Toxicol*.  
408 2015;53: 893–900. doi:10.3109/15563650.2015.1088157
- 409 23. Final Report of the European Drug Emergencies Network ( Euro - DEN ) March 2015.  
410 2015.
- 411 24. R Core Team. R: A Language and Environment for Statistical Computing [Internet]. Vienna,  
412 Austria: R Foundation for Statistical Computing; 2016. Available: <https://www.r-project.org/>
- 413 25. Wickham H. ggplot2: Elegant Graphics for Data Analysis [Internet]. New York: Springer-  
414 Verlag New York; 2009. Available: <http://ggplot2.org>
- 415 26. Wickham H, Francois R. dplyr: A Grammar of Data Manipulation [Internet]. 2016.  
416 Available: <https://cran.r-project.org/package=dplyr>
- 417 27. Auguie B. gridExtra: Miscellaneous Functions for ‘Grid’ Graphics [Internet]. 2016.  
418 Available: <https://cran.r-project.org/package=gridExtra>
- 419 28. Wickham H. Reshaping Data with the reshape Package. *J Stat Softw*. 2007;21: 1–20.  
420 Available: <http://www.jstatsoft.org/v21/i12/>
- 421 29. Persson, H. E., Sjöberg, G. K., Haines, J. A., de Garbino, J. P. Poisoning severity score.  
422 Grading of acute poisoning. *Journal of Toxicology: Clinical Toxicology*, 36(3), 205-213.
- 423 30. Richards JR. Rhabdomyolysis and drugs of abuse. *J Emerg Med*. 2000;19: 51–6. Available:  
424 <http://www.ncbi.nlm.nih.gov/pubmed/10863119>
- 425 31. Goldstein RA, DesLauriers C, Burda AM. Cocaine: History, Social Implications, and  
426 Toxicity—A Review. *Disease-a-Month*. 2009;55: 6–38.  
427 doi:10.1016/j.disamonth.2008.10.002
- 428 32. Borek HA, Holstege CP. Hyperthermia and multiorgan failure after abuse of ‘bath salts’  
429 containing 3,4-methylenedioxypyrovalerone. *Ann Emerg Med*. 2012;60: 103–5.  
430 doi:10.1016/j.annemergmed.2012.01.005
- 431 33. Liechti ME, Kupferschmidt H. Gamma-hydroxy-butyrate (GHB) and gamma-butyrolactone  
432 (GBL): analysis of overdose cases reported to the Swiss Toxicological Information Centre.  
433 *Swiss Med Wkly* 2004;134:534–7.

- 434 34. Liechti ME, Kupferschmidt H. Reply: Rhabdomyolysis and drugs of abuse. *Swiss Med*  
435 *Wkly* 2005, 135:206-7.
- 436 35. Liechti, M. E., Kunz, I., & Kupferschmidt, H. (2005). Acute medical problems due to  
437 Ecstasy use. Case-series of emergency department visits. *Swiss medical weekly*, 135(43-44),  
438 652-657.
- 439 36. Delaney KA, Givens ML, Vohra RB. Use of RIFLE criteria to predict the severity and  
440 prognosis of acute kidney injury in emergency department patients with rhabdomyolysis. *J*  
441 *Emerg Med*. 2012;42: 521–8. doi:10.1016/j.jemermed.2011.03.008
- 442 37. Richards JR. Rhabdomyolysis and drugs of abuse. *J Emerg Med*. 2000;19: 51–6. Available:  
443 <http://www.ncbi.nlm.nih.gov/pubmed/10863119>
- 444 38. Fernandez WG, Hung O, Bruno GR, Galea S, Chiang WK. Factors predictive of acute renal  
445 failure and need for hemodialysis among ED patients with rhabdomyolysis. *Am J Emerg*  
446 *Med*. 2005;23: 1–7.
- 447 39. Grunau BE, Pourvali R, Wiens MO, Levin A, Li J, Grafstein E, et al. Characteristics and  
448 thirty-day outcomes of emergency department patients with elevated creatine kinase. O’Neil  
449 BJ, editor. *Acad Emerg Med*. 2014;21: 631–6. doi:10.1111/acem.12385
- 450 40. Veenstra J, Smit WM, Krediet RT, Arisz L. Relationship between elevated creatine  
451 phosphokinase and the clinical spectrum of rhabdomyolysis. *Nephrol Dial Transplant*.  
452 1994;9: 637–41. Available: <http://www.ncbi.nlm.nih.gov/pubmed/7970089>
- 453 41. Janković SR, Stosić JJ, Vucinić S, Vukcević NP, Ercegović GV. Causes of rhabdomyolysis  
454 in acute poisonings. *Vojnosanit Pregl*. 2013;70: 1039–45. Available:  
455 <http://www.ncbi.nlm.nih.gov/pubmed/24397200>
- 456 42. Gabow PA, Kaehny WD, Kelleher SP. The spectrum of rhabdomyolysis. *Medicine*  
457 (Baltimore). 1982;61: 141–52. Available: <http://www.ncbi.nlm.nih.gov/pubmed/7078398>
- 458 43. Ward MM. Factors predictive of acute renal failure in rhabdomyolysis. *Arch Intern Med*.  
459 1988;148: 1553–7. Available: <http://www.ncbi.nlm.nih.gov/pubmed/3382301>
- 460 44. Woodrow G, Brownjohn AM, Turney JH. The clinical and biochemical features of acute  
461 renal failure due to rhabdomyolysis. *Ren Fail*. 1995;17: 467–74. Available:  
462 <http://www.ncbi.nlm.nih.gov/pubmed/7569117>
- 463 45. Brown CVR, Rhee P, Chan L, Evans K, Demetriades D, Velmahos GC. Preventing renal  
464 failure in patients with rhabdomyolysis: do bicarbonate and mannitol make a difference? *J*  
465 *Trauma*. 2004;56: 1191–6. Available: <http://www.ncbi.nlm.nih.gov/pubmed/15211124>
- 466 46. de Meijer AR, Fikkers BG, de Keijzer MH, van Engelen BGM, Drenth JPH. Serum creatine  
467 kinase as predictor of clinical course in rhabdomyolysis: a 5-year intensive care survey.  
468 *Intensive Care Med*. 2003;29: 1121–5. doi:10.1007/s00134-003-1800-5
- 469 47. Supady A, Schwab T, Busch H-J. „Liquid Ecstasy”: Gamma-Butyrolacton-Entzugsdelir mit  
470 Rhabdomyolyse und dialysepflichtiger Niereninsuffizienz. *DMW - Dtsch Medizinische*  
471 *Wochenschrift*. 2009;134: 935–937. doi:10.1055/s-0029-1220252
- 472 48. Liakoni E, Yates C, Dines AM, et al. Acute recreational drug toxicity: Comparison of self-  
473 reports and results of immunoassay and additional analytical methods in a multicenter  
474 European case series. *Medicine (Baltimore)*. 97(5):e9784.  
475 doi:10.1097/MD.00000000000009784  
476  
477

Figure 1

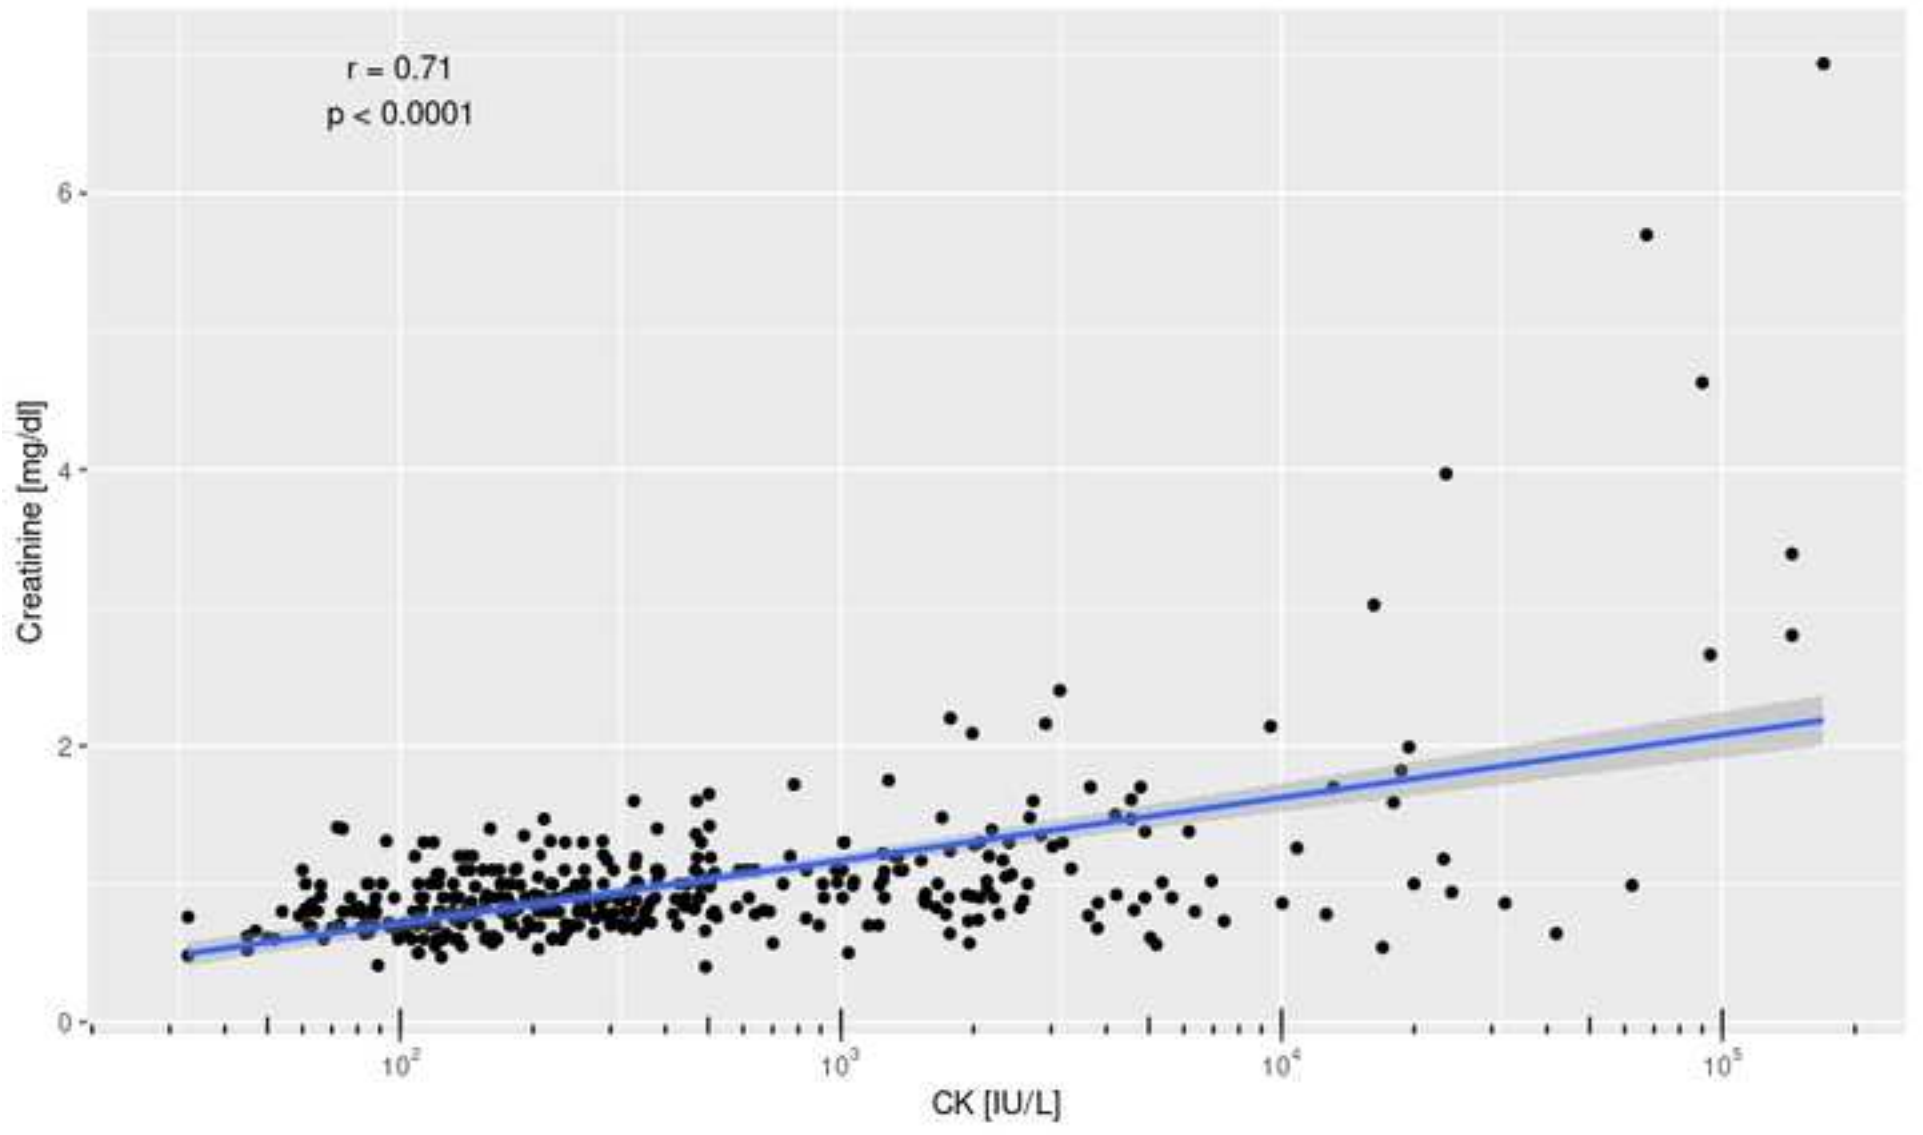

Supplement: pone.0246297.s001.pdf [file pone.0246297.s001.pdf]
